# Supplementary material
Source: PubMed Central journal article supplement (PMC5710247)
Supplement: jamapsychiatry-74-740-s001.pdf [file jamapsychiatry-74-740-s001.pdf]

## Supplementary Online Content

Orlovska S, Vestergaard CH, Bech BH, Nordentoft M, Vestergaard M, Benros ME. Association of streptococcal throat infection with mental disorders: testing key aspects of the PANDAS hypothesis in a nationwide study. *JAMA Psychiatry*. Published online May 24, 2017. doi:10.1001/jamapsychiatry.2017.0995

**eAppendix.** Statistical Analyses

**eReference.**

**eTable 1.** Diagnosis Codes Based on the World Health Organization International Classification of Diseases Codes from the *ICD-10* Period and Antibiotics According to the Anatomical Therapeutic Chemical System from the World Health Organization

**eTable 2.** Demographic Variables for Individuals Without a Streptococcal Test and Individuals With a Negative or Positive Test

**eTable 3.** Risk of Any Mental Disorder in Persons With Positive Streptococcal Tests, Stratified by the Specific Diagnostic *ICD-10* Codes Included in the Category of any Mental Disorder

**eTable 4.** Risk of Mental Disorders in Cases Compared With Siblings With Positive and Negative Streptococcal Tests

**eTable 5.** Risk of Mental Disorders in Individuals With Positive and Negative Streptococcal Tests, by Sex and Parental History of Autoimmune Disease

This supplementary material has been provided by the authors to give readers additional information about their work.

## **eAppendix. Statistical Analyses**

The risk of mental disorders was estimated according to age with particular focus on the age group of 3-11 years since the diagnostic working criteria for PANDAS imply that the neuropsychiatric symptoms debut from the age of 3 years to the beginning of puberty.<sup>1</sup> We investigated the importance of time since the streptococcal test was performed and a dose-response relationship by testing for a linear relationship between the number of tests and the following risk of the outcomes. In order to investigate a possible interaction between a streptococcal test and respectively sex and a personal or parental history of autoimmune disease, we stratified for these variables and made comparisons of the IRRs for exposure to a positive or negative test between the stratification groups and estimated statistical differences by P-values.

## **eReference**

1. Swedo SE, Leonard HL, Garvey M, et al. Pediatric autoimmune neuropsychiatric disorders associated with streptococcal infections: clinical description of the first 50 cases. *Am J Psychiatry*. 1998;155(February):264-271. <http://www.ncbi.nlm.nih.gov/pubmed/9464208>.

**eTable 1.** Diagnosis Codes Based on the World Health Organization International Classification of Diseases Codes from the *ICD-10* Period and Antibiotics According to the Anatomical Therapeutic Chemical System from the World Health Organization

| <b>Outcome diagnoses</b>                  | <b>ICD-10</b>                                                                                                                                                                                                             |
|-------------------------------------------|---------------------------------------------------------------------------------------------------------------------------------------------------------------------------------------------------------------------------|
| Any mental disorder                       | F00-F99                                                                                                                                                                                                                   |
| Tic disorders including Tourette syndrome | F95                                                                                                                                                                                                                       |
| OCD                                       | F42                                                                                                                                                                                                                       |
| <b>Other diagnoses</b>                    | <b>ICD-10</b>                                                                                                                                                                                                             |
| Infections                                | A00-B99, E23.6A, G00, I02, J00–J18, K35, L00–L08, M00, N30.0, N51.8B, N70– N72, N76, N77.0D, N77.1B, N77.1L, O23, O26.4, O85, O86, O98, P35.2A                                                                            |
| Autoimmune diseases                       | D51.0, D59.1, D69.3, E05.0, E06.3, E10, E27.1, G35, G61.0, G70.0, H20, K50, K51, K73, K74.3, K90.0, L10, L12, L40.0-3, L40.5-9, L63, L80, M05, M06, M08, M31.3, M31.5, M31.6, M32.1, M32.9, M33, M34, M35.0, M35.3, M45.9 |
| Family history of psychiatric disorders   | F00-F99                                                                                                                                                                                                                   |
| <b>Antibiotic</b>                         | <b>ATC code</b>                                                                                                                                                                                                           |
| Phenoxyethylpenicillin                    | J01CE02                                                                                                                                                                                                                   |
| Amoxicillin                               | J01CA04                                                                                                                                                                                                                   |
| Amoxicillin/clavulanic acid               | J01CR02                                                                                                                                                                                                                   |
| Clarithromycin                            | J01FA09                                                                                                                                                                                                                   |
| Roxithromycin                             | J01FA06                                                                                                                                                                                                                   |
| Clindamycin                               | J01FF01                                                                                                                                                                                                                   |

**eTable 2.** Demographic Variables for Individuals Without a Streptococcal Test and Individuals With a Negative or Positive Test

| <b>Covariates</b>                               | <b>No test</b> | <b>Negative test</b> | <b>Positive test</b> |
|-------------------------------------------------|----------------|----------------------|----------------------|
| <b>N (%)</b>                                    | 429,478 (40.2) | 288,283 (27.0)       | 349,982 (32.8)       |
| <b>Sex (female), N (%)</b>                      | 208,141 (48.5) | 142,838 (49.5)       | 168,842 (48.2)       |
| <b>Birth year, N (%)</b>                        |                |                      |                      |
| 1996-2001                                       | 113,792 (26.5) | 101,208 (35.1)       | 148,814 (42.5)       |
| 2002-2007                                       | 131,833 (30.7) | 97,828 (33.9)        | 123,969 (35.4)       |
| 2008-2013                                       | 183,853 (42.8) | 89,247 (31.0)        | 77,199 (22.1)        |
| <b>Maternal education, N (%)</b>                |                |                      |                      |
| ≤10 years                                       | 74,009 (17.2)  | 46,292 (16.1)        | 54,623 (15.6)        |
| >10 and ≤15 years                               | 183,468 (42.7) | 132,741 (46.0)       | 165,658 (47.3)       |
| >15 years                                       | 160,760 (37.4) | 104,857 (36.4)       | 125,646 (35.9)       |
| Unknown                                         | 11,241 (2.6)   | 4,393 (1.5)          | 4,055 (1.2)          |
| <b>Maternal marital status, N (%)</b>           |                |                      |                      |
| Married                                         | 265,108 (61.7) | 191,195 (66.3)       | 243,359 (69.5)       |
| Divorced                                        | 26,317 (6.1)   | 25,026 (8.7)         | 35,118 (10.0)        |
| Unmarried                                       | 137,006 (31.9) | 71,085 (24.7)        | 70,089 (20.0)        |
| Widow                                           | 1,047 (0.2)    | 977 (0.3)            | 1,416 (0.4)          |
| <b>Maternal income in deciles, N (%)</b>        |                |                      |                      |
| 1-3                                             | 33,489 (7.8)   | 13,432 (4.7)         | 12,223 (3.5)         |
| 4-7                                             | 212,170 (49.4) | 127,832 (44.3)       | 141,935 (40.6)       |
| 8-10                                            | 183,819 (42.8) | 147,019 (51.0)       | 195,824 (56.0)       |
| <b>Parental mental disorder (yes), N (%)</b>    | 88,691 (20.7)  | 66,918 (23.2)        | 82,036 (23.4)        |
| <b>Parental autoimmune disease (yes), N (%)</b> | 32,437 (7.6)   | 26,102 (9.1)         | 34,841 (10.0)        |
| <b>Personal autoimmune disease (yes), N (%)</b> | 1,548 (0.4)    | 1,912 (0.7)          | 2,989 (0.9)          |

Streptococcal test=rapid antigen diagnostic test for group A beta-hemolytic streptococcal throat infections. N=number of individuals.

**eTable 3.** Risk of Any Mental Disorder in Persons With Positive Streptococcal Tests, Stratified by the Specific Diagnostic *ICD-10* Codes Included in the Category of any Mental Disorder

| Specific <i>ICD-10</i> codes in the category of any mental disorder                                         | No streptococcal test (reference) |                           | Positive streptococcal test |                           |
|-------------------------------------------------------------------------------------------------------------|-----------------------------------|---------------------------|-----------------------------|---------------------------|
|                                                                                                             | N                                 | IRR <sup>a</sup> (95% CI) | N                           | IRR <sup>a</sup> (95% CI) |
| <b>F00-09: Organic, including symptomatic, mental disorders</b>                                             | 20                                | 1.00                      | 31                          | 1.91 (0.99-3.67)          |
| <b>F10-19: Mental and behavioral disorders due to psychoactive substance use</b>                            | 313                               | 1.00                      | 453                         | <b>1.25</b> (1.06-1.49)   |
| <b>F20-29: Schizophrenia, schizotypal, and delusional disorders</b>                                         | 48                                | 1.00                      | 137                         | 1.40 (1.00-1.95)          |
| <b>F30-39: Mood disorders</b>                                                                               | 145                               | 1.00                      | 507                         | <b>1.64</b> (1.36-1.98)   |
| <b>F40-49: Neurotic, stress-related, and somatoform disorders</b>                                           | 2,448                             | 1.00                      | 2,933                       | <b>1.24</b> (1.16-1.32)   |
| <b>F50-59: Behavioral syndromes associated with physiological disturbances and physical factors</b>         | 1,187                             | 1.00                      | 724                         | 1.03 (0.92-1.16)          |
| <i>F50: Eating disorders</i>                                                                                | 813                               | 1.00                      | 542                         | 0.91 (0.80-1.04)          |
| <b>F60-69: Disorders of adult personality and behavior</b>                                                  | 42                                | 1.00                      | 95                          | <b>1.85</b> (1.23-2.80)   |
| <b>F70-79: Mental retardation</b>                                                                           | 938                               | 1.00                      | 634                         | 1.05 (0.94-1.18)          |
| <b>F80-89: Disorders of psychological development</b>                                                       | 3,005                             | 1.00                      | 2,826                       | 1.06 (1.00-1.12)          |
| <b>F90-99: Behavioral and emotional disorders with onset usually occurring in childhood and adolescence</b> | 5,566                             | 1.00                      | 7,068                       | <b>1.21</b> (1.17-1.26)   |
| <i>F90: Hyperkinetic disorders</i>                                                                          | 1,984                             | 1.00                      | 3,337                       | <b>1.24</b> (1.17-1.31)   |

Streptococcal test=rapid antigen diagnostic test for group A beta-hemolytic streptococcal throat infections. N=number of individuals.

<sup>a</sup>Adjusted for sex, age, and calendar year.

Boldface indicates that the reference interval did not include 1.00 (reference).

**eTable 4.** Risk of Mental Disorders in Cases Compared With Siblings With Positive and Negative Streptococcal Tests

| Result of streptococcal test         | Any mental disorder |           |                   | OCD             |           |                   | Tic disorders   |           |                   |
|--------------------------------------|---------------------|-----------|-------------------|-----------------|-----------|-------------------|-----------------|-----------|-------------------|
|                                      | OR <sup>a</sup>     | 95%CI     | N, Cases/siblings | OR <sup>a</sup> | 95%CI     | N, Cases/siblings | OR <sup>a</sup> | 95%CI     | N, Cases/siblings |
| <b>No test (reference, sibling)</b>  | 1.00                | -         | 8,405/9,889       | 1.00            | -         | 178/190           | 1.00            | -         | 402/452           |
| <b>Positive (case)</b>               | 1.05                | 0.96-1.16 |                   | 1.22            | 0.69-2.18 |                   | 1.10            | 0.72-1.68 |                   |
| <b>Negative (reference, sibling)</b> | 1.00                | -         | 6,519/7,188       | 1.00            | -         | 199/211           | 1.00            | -         | 474/520           |
| <b>Positive (case)</b>               | 1.07                | 0.99-1.16 |                   | <b>1.94</b>     | 1.18-3.20 |                   | 0.97            | 0.71-1.32 |                   |

Streptococcal test=rapid antigen diagnostic test for group A beta-hemolytic streptococcal throat infections. N=number of individuals.

<sup>a</sup>Adjusted for sex and calendar year.

Boldface indicates that the reference interval did not include 1.00 (reference).

**eTable 5.** Risk of Mental Disorders in Individuals With Positive and Negative Streptococcal Tests, by Sex and Parental History of Autoimmune Disease

| Sex                                | Result of streptococcal test | Any mental disorder |                  |           | OCD |                  |           | Tic disorders |                  |           |
|------------------------------------|------------------------------|---------------------|------------------|-----------|-----|------------------|-----------|---------------|------------------|-----------|
|                                    |                              | N                   | IRR <sup>a</sup> | 95%CI     | N   | IRR <sup>a</sup> | 95%CI     | N             | IRR <sup>a</sup> | 95%CI     |
| Female                             | No test (reference)          | 5,255               | 1.00             | -         | 115 | 1.00             | -         | 118           | 1.00             | -         |
|                                    | Negative                     | 4,164               | 1.04             | 1.00-1.09 | 176 | 1.26             | 1.00-1.60 | 154           | <b>1.30</b>      | 1.02-1.66 |
|                                    | Positive                     | 5,878               | <b>1.24</b>      | 1.19-1.29 | 306 | <b>1.51</b>      | 1.22-1.88 | 230           | <b>1.50</b>      | 1.20-1.87 |
| Male                               | No test (reference)          | 8,457               | 1.00             | -         | 91  | 1.00             | -         | 404           | 1.00             | -         |
|                                    | Negative                     | 7,151               | <b>1.11</b>      | 1.08-1.15 | 140 | 1.31             | 1.00-1.70 | 508           | <b>1.24</b>      | 1.09-1.41 |
|                                    | Positive                     | 9,530               | <b>1.15</b>      | 1.11-1.19 | 250 | <b>1.50</b>      | 1.18-1.90 | 763           | <b>1.31</b>      | 1.16-1.48 |
| <b>Parental autoimmune disease</b> |                              |                     |                  |           |     |                  |           |               |                  |           |
| Yes                                | No test (reference)          | 1,101               | 1.00             | -         | 19  | 1.00             | -         | 41            | 1.00             | -         |
|                                    | Negative                     | 1,007               | 1.02             | 0.94-1.12 | 39  | 1.57             | 0.91-2.71 | 66            | 1.46             | 0.99-2.15 |
|                                    | Positive                     | 1,598               | <b>1.19</b>      | 1.10-1.29 | 60  | 1.52             | 0.91-2.54 | 82            | 1.22             | 0.84-1.78 |
| No                                 | No test (reference)          | 12,611              | 1.00             | -         | 187 | 1.00             | -         | 481           | 1.00             | -         |
|                                    | Negative                     | 10,308              | <b>1.09</b>      | 1.06-1.12 | 277 | <b>1.25</b>      | 1.04-1.50 | 596           | <b>1.23</b>      | 1.09-1.39 |
|                                    | Positive                     | 13,810              | <b>1.18</b>      | 1.15-1.21 | 496 | <b>1.50</b>      | 1.27-1.78 | 911           | <b>1.36</b>      | 1.21-1.52 |

Streptococcal test=rapid antigen diagnostic test for group A beta-hemolytic streptococcal throat infections. N=number of individuals.

<sup>a</sup>Adjusted for sex, age, and calendar year.

Boldface indicates that the reference interval did not include 1.00 (reference).
